# Supplementary material
Source: PubMed Central journal article supplement (PMC7934815)

# Tactical Urbanism for COVID-19

short-term interventions with a  
long-term health vision

**Tactical Urbanism** is a low-cost, temporary intervention that can be quickly implemented in cities of any size. Many of these interventions can be made permanent to promote **urban improvements and public health**.

This **infographic** summarizes Tactical Urbanism interventions that can support **COVID-19 mitigation** strategies, with a long-term health vision. Tactical Urbanism is a complementary tool to containment strategies, such as a coordinated government response, wide-spread testing, contact tracing, and quarantine. **These interventions should at least be considered until curative treatment and/or a vaccine becomes widely available.**

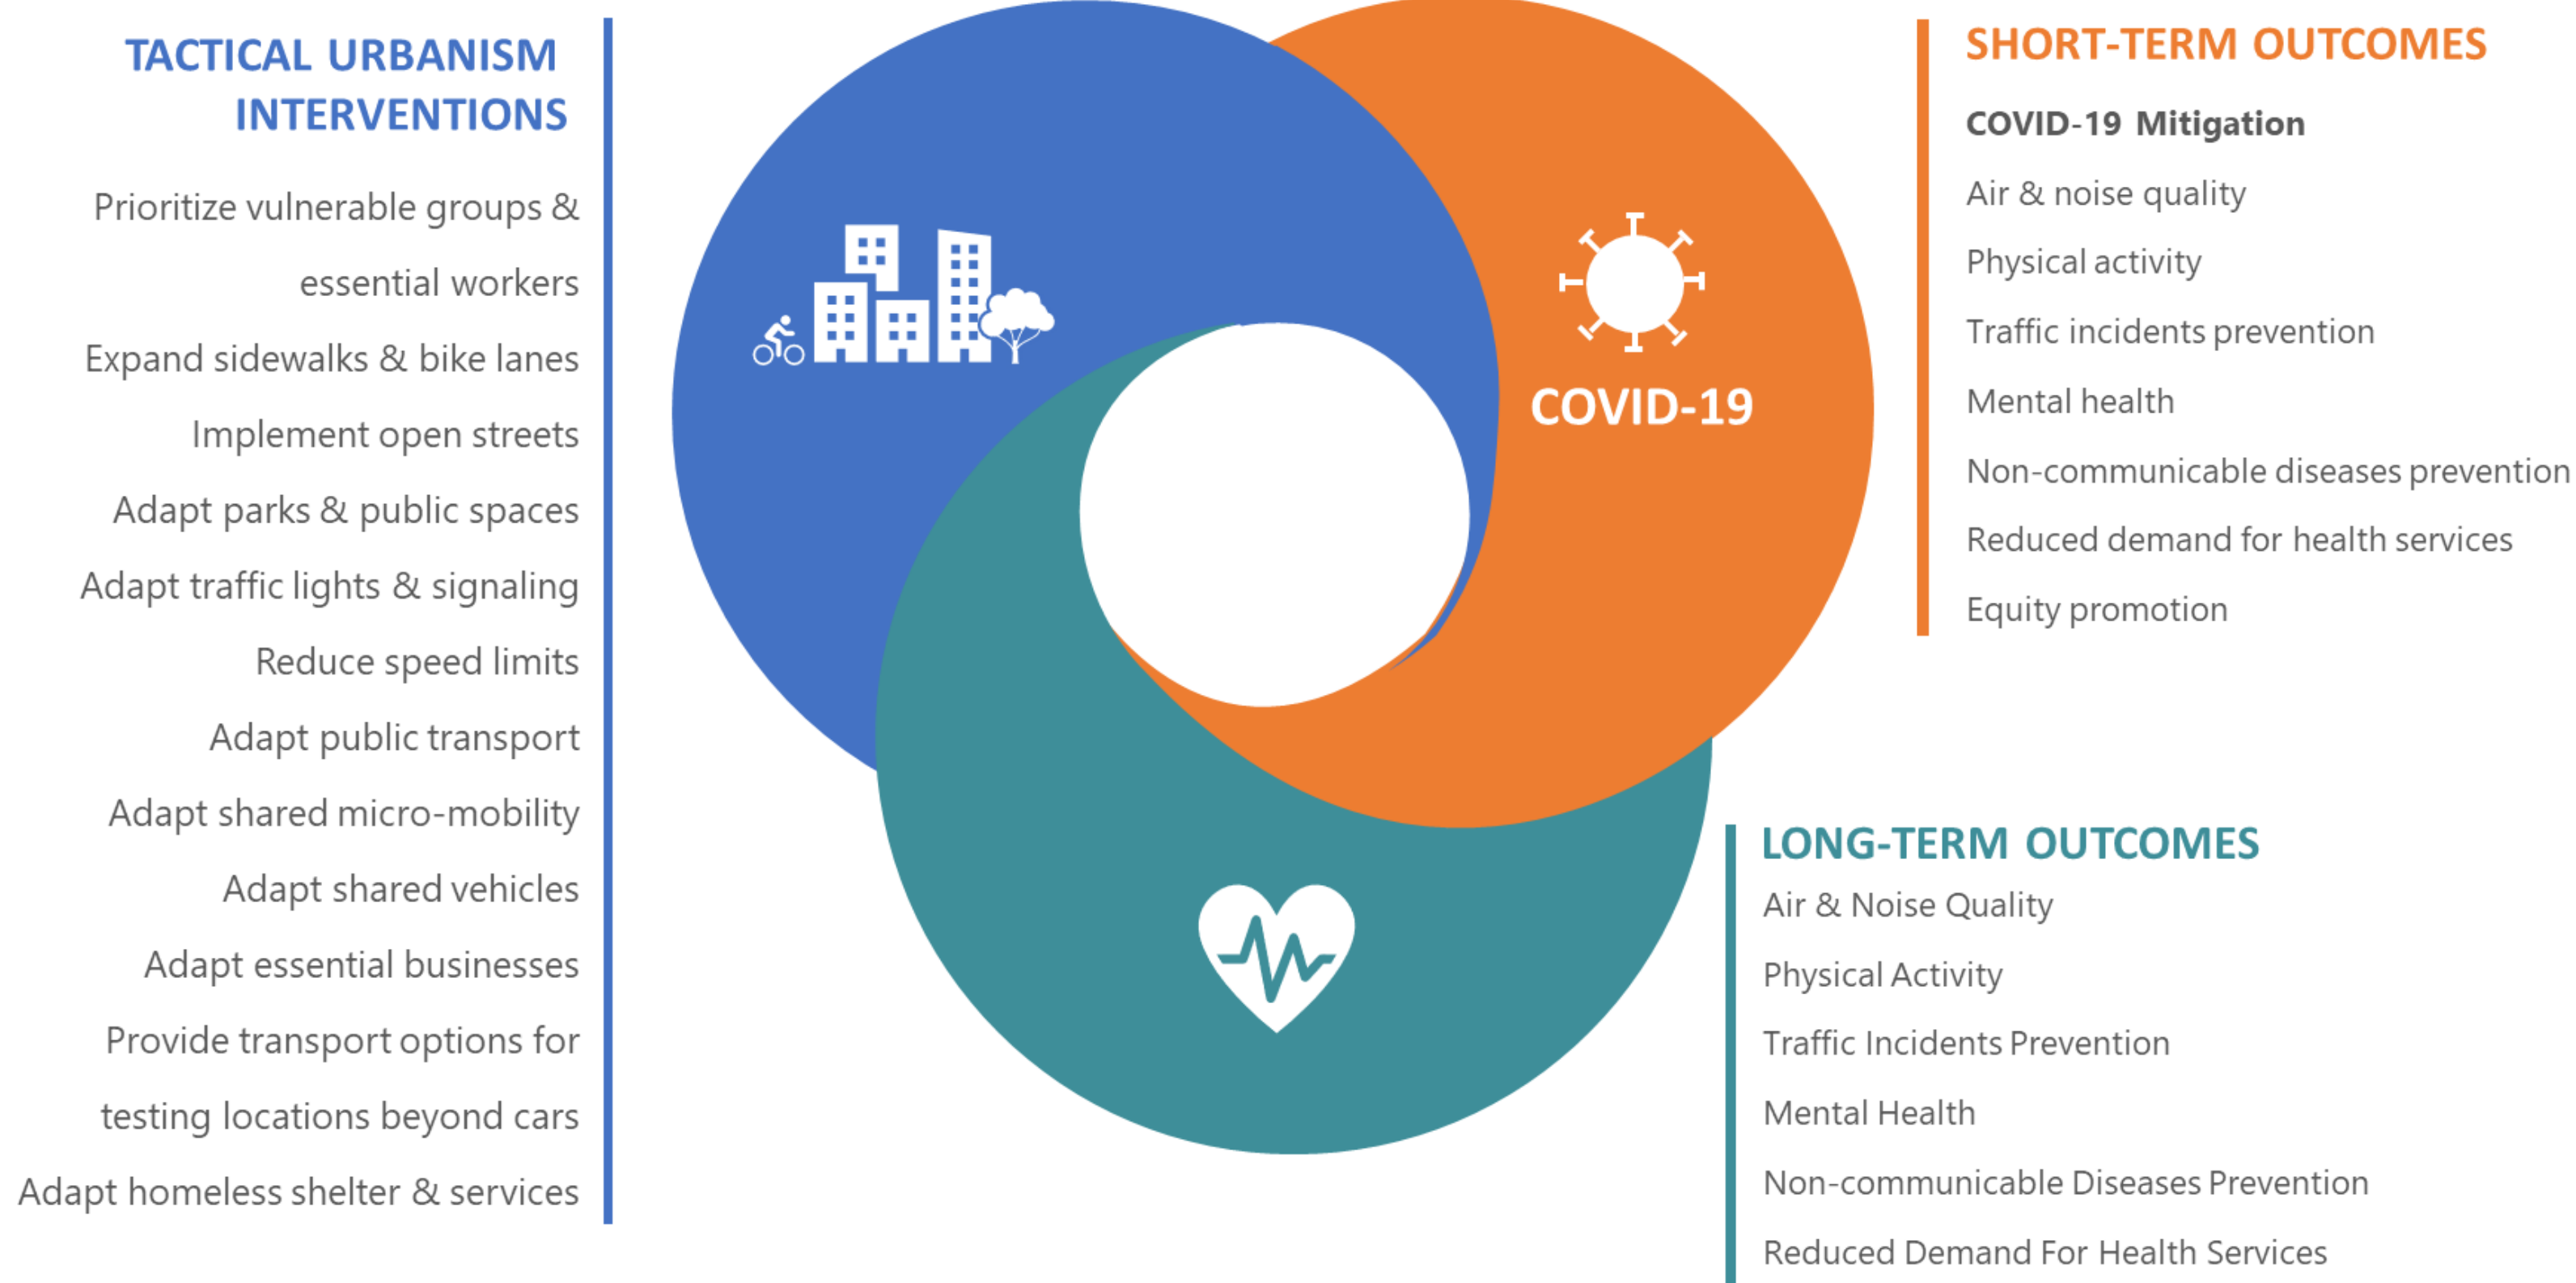

## 1. General tactical urbanism recommendations.

Implement tactical urbanism interventions early; discourage the use of public spaces and public transport for confirmed and suspected cases; encourage physical distancing (2 meters/ 6 feet); encourage physical activity; expand public open spaces; restrict access to public areas where physical distancing is not possible; avoid large gatherings; design interventions and prioritize implementation for vulnerable groups and essential workers; inform, promote, and enforce traffic safety regulations; and inform (clearly and accessibly) physical distancing orders and tactical urbanism changes (areas, uses, and schedules).

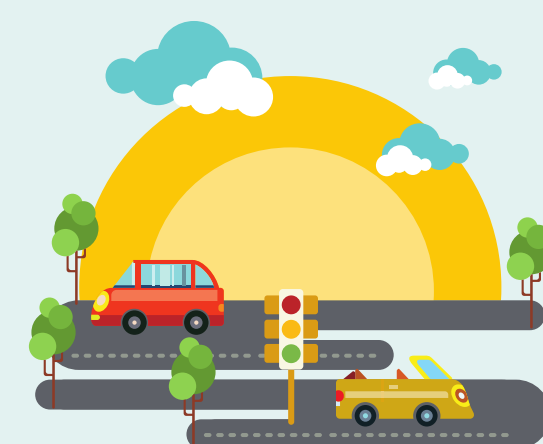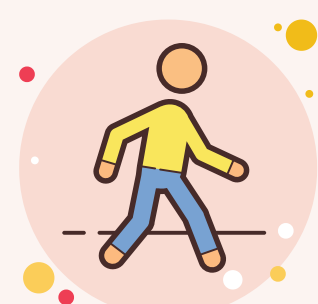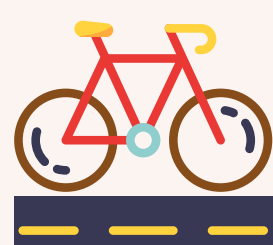

## 2. Sidewalks and bike lanes.

Promote walking and biking; expand sidewalks and bike lanes width, length, and connectivity to support physical distancing and traffic safety; expand sidewalks and bike lanes around parks, trails, and public spaces to reduce pressure on those spaces; implement protected bike lanes; expand bike parking; create pedestrian and cycling corridors and/or schedules for vulnerable populations (e.g., elderly and immunocompromised); use existing cycling and walking infrastructure proposals to guide the expansion; and encourage the use of bike helmets.

### 3. Open streets.

Implement everyday open streets; expand current open streets; enforce physical distance; avoid large gatherings; create user schedules favoring vulnerable populations; and utilize open street traffic management protocols to support the expansion of new sidewalks and bike infrastructure.

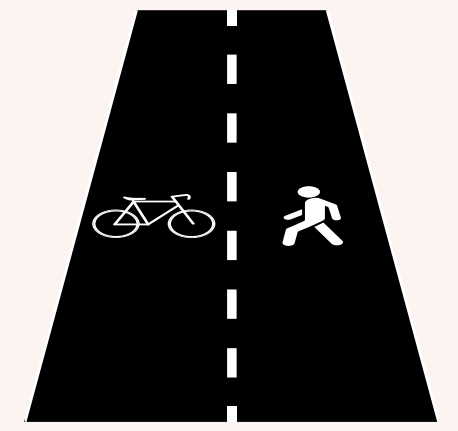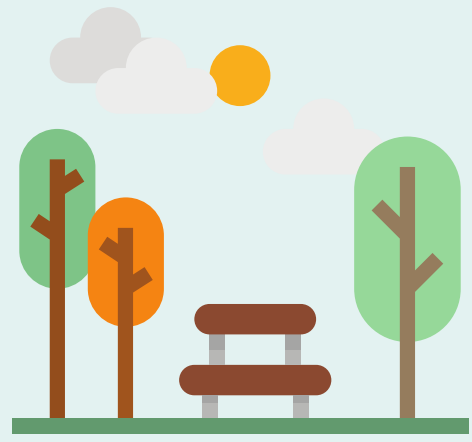

### 4. Parks and public spaces.

Keep large public spaces (e.g., parks, open spaces, squares, plazas) open where physical distance can be maintained; expand small open spaces; enforce physical distance; avoid large gatherings; expand bikes/e-scooter parking; create user schedules favoring vulnerable populations; and prevent peak usage, informing and organizing users visits across different time windows.

### 5. Traffic lights, signaling, and speed limits.

Shift from actuated to fixed traffic signals; adjust traffic light timing favoring pedestrians and cyclists; provide updated, clear, and accessible tactical urbanism signaling; include stay-at-home and physical distancing recommendations on traffic screens and signs; and lower traffic speed limits.

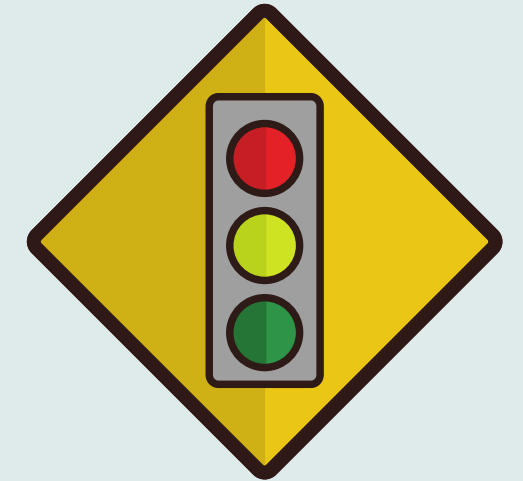

### 6. Public transport, shared micromobility (e.g., bikes, scooters), and shared vehicles (e.g., taxi, Uber/Lyft).

Implement strict cleaning protocols and support efficient ventilation in vehicles and stations; implement back-door boarding; suspend in-person fare collection or implement waived fares; distribute face coverings, protective glasses, gloves and sanitizer to drivers and passengers; limit passenger-driver interaction; enforce physical distancing; close every other row of seats; reduce maximum occupancy and increase service on crowding routes; install physical barriers (e.g., sneeze guards and partitions); create user schedules favoring vulnerable populations (e.g., elderly); support services for essential workers; promote bike-share; expand bike/e-scooter parking; encourage the use of bike/scooter helmets; integrate shared micromobility to public transit and bike lanes; and discourage or stop ridesharing (carpooling or vanpooling) and ridesplitting (e.g., Uber pool).

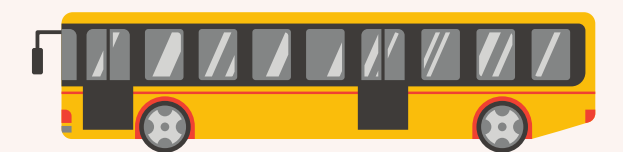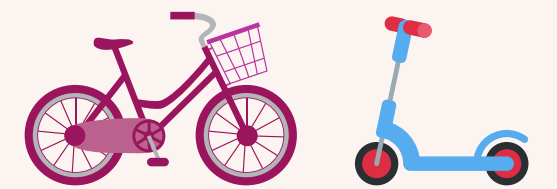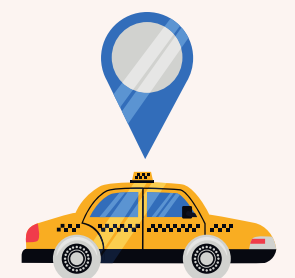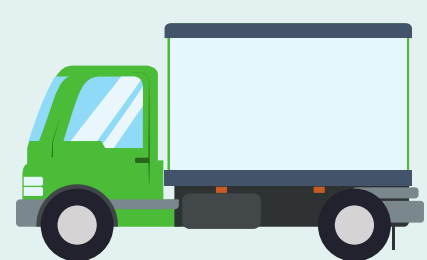

### 7. Motorized traffic.

Concentrate motorized transport in few streets and remove traffic lanes/parking space to support car-free streets, active transportation, and traffic safety; and when possible concentrate freight traffic on main roads and at nighttime to improve traffic safety.

### 8. Essential business.

Designate bike shops as essential services; expand sidewalks for on-sidewalk queuing, restaurant seating, and outdoor markets; avoid large gatherings; enforce physical distance; provide service to non-motorize transport; and establish dedicated delivering/loading zones.

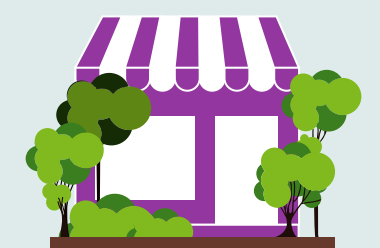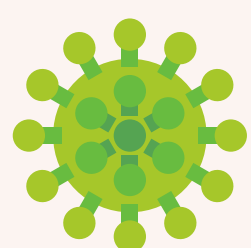

### 9. Test and vaccination locations.

Provide multi-modal options to access test and vaccination sites and other health services.

### 10. Homelessness.

Provide and adapt homeless shelters and services suited for physical distancing and COVID-19.

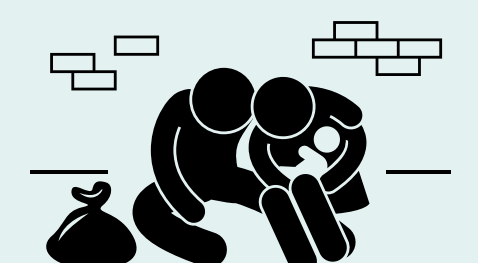

# Urbanismo Táctico para COVID-19

## intervenciones a corto plazo con una visión de salud a largo plazo

El **Urbanismo Táctico** es una intervención temporal de bajo costo que se puede implementar rápidamente en ciudades de cualquier tamaño. Muchas de estas intervenciones pueden hacerse permanentes para favorecer las **mejoras urbanas y la salud pública**.

Este **infográfico** resume las intervenciones de Urbanismo Táctico que pueden apoyar las estrategias de **mitigación para COVID-19** con una visión de salud a largo plazo. El Urbanismo Táctico es una herramienta complementaria a las estrategias de contención de la pandemia, como una respuesta coordinada del gobierno, amplia cobertura en pruebas de detección del virus, localización de infectados y sus contactos, y cuarentena. **Estas intervenciones deben considerarse por lo menos hasta que un tratamiento curativo y/o una vacuna estén ampliamente disponibles.**

### INTERVENCIONES DE URBANISMO TÁCTICO

- Dar prioridad a grupos vulnerables y trabajadores esenciales
- Expandir aceras y carriles bici
- Implementar ciclovías recreativas
- Adaptar parques y espacios públicos
- Adaptar semáforos y señalización
- Reducir los límites de velocidad
- Adaptar el transporte público
- Adaptar la micromovilidad compartida
- Adaptar los vehículos compartidos
- Adaptar los comercios esenciales
- Proporcionar acceso a lugares de prueba de COVID-19 para modos no motorizados
- Adaptar los servicios y refugio para las personas sin hogar

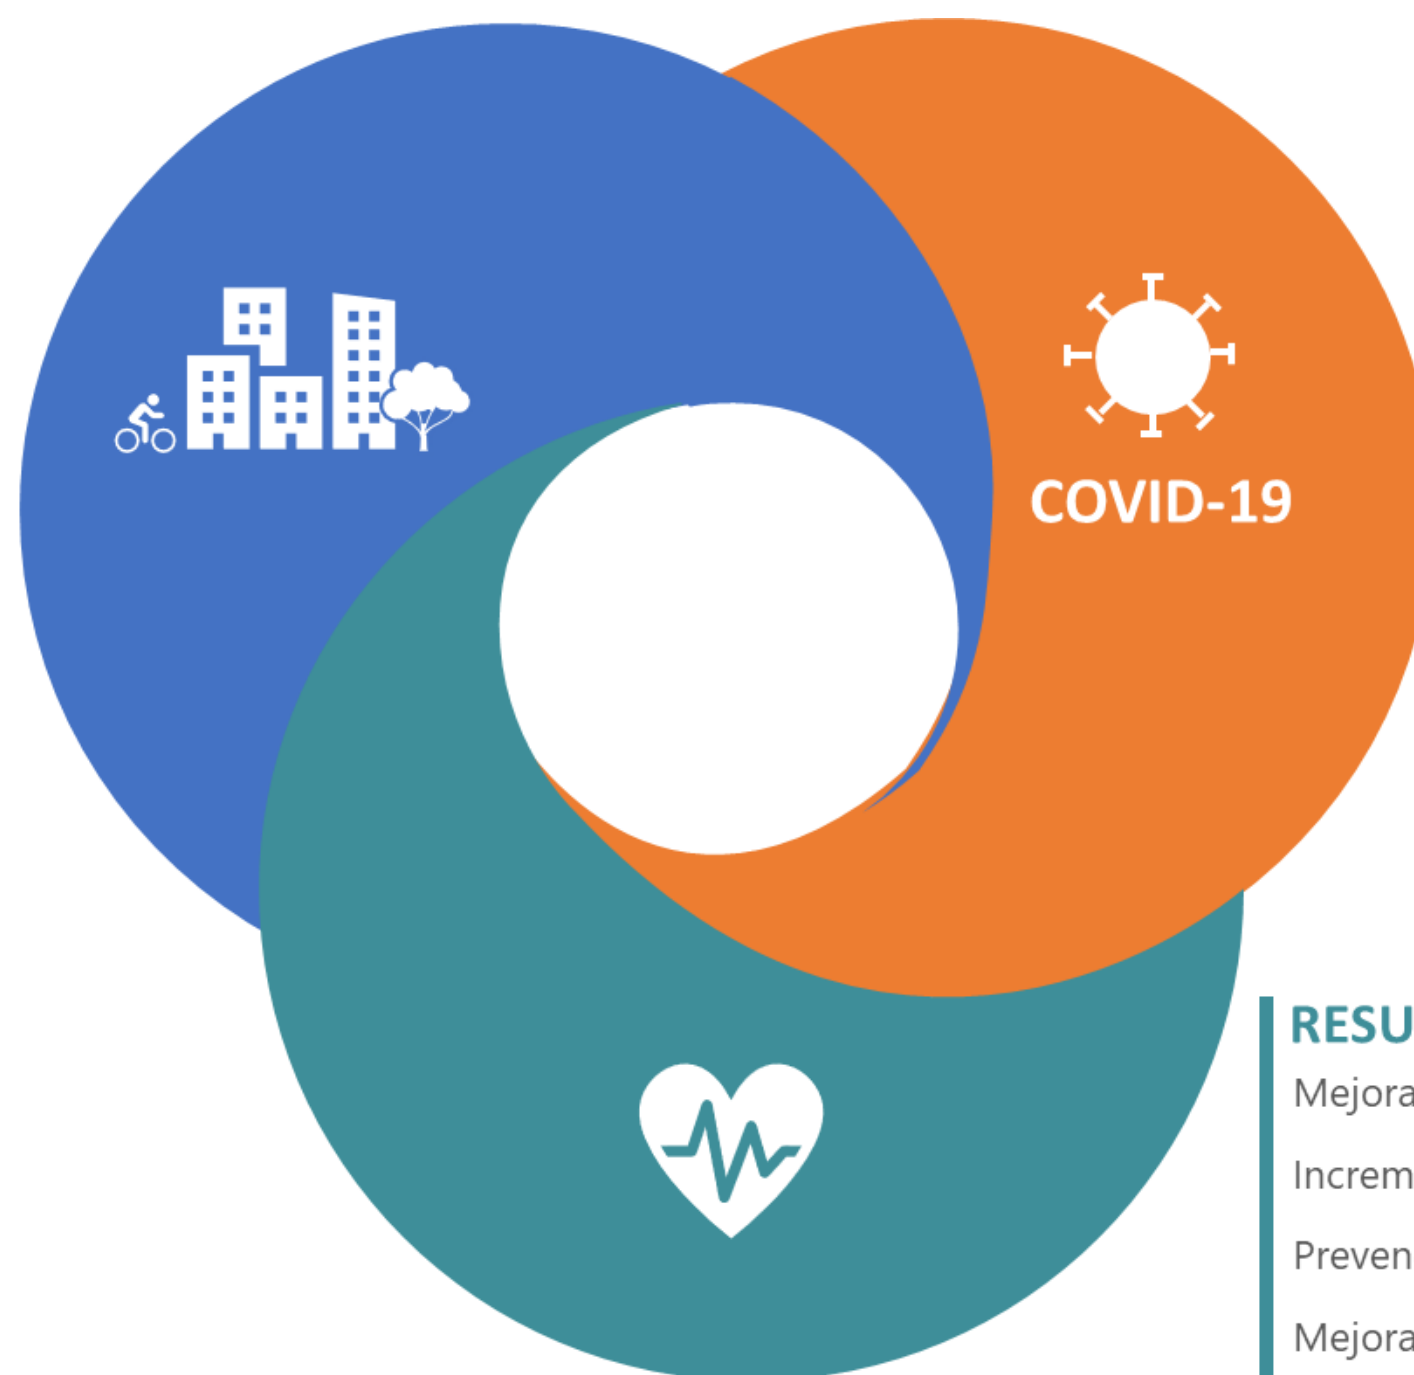

### RESULTADOS A CORTO PLAZO

#### Mitigación de COVID-19

- Mejoras de la calidad de aire y ruido
- Incremento en la actividad física
- Prevención de incidentes de tráfico
- Mejora en la salud mental
- Prevención de enfermedades no transmisibles
- Menor demanda de servicios de salud
- Promoción de la equidad

### RESULTADOS A LARGO PLAZO

- Mejoras de la calidad de aire y ruido
- Incremento en la actividad física
- Prevención de incidentes de tráfico
- Mejora en la salud mental
- Prevención de enfermedades no transmisibles
- Menor demanda de servicios de salud
- Promoción de la equidad

## 1. Recomendaciones generales de urbanismo táctico.

Implemente intervenciones de urbanismo táctico de forma temprana; desaliente el uso de espacios públicos y transporte público para casos confirmados y sospechosos; aliente el distanciamiento físico (2 metros / 6 pies); aliente la actividad física; expanda los espacios públicos; restrinja el acceso a las áreas públicas donde el distanciamiento físico no sea posible; evite aglomeraciones; diseñe intervenciones y priorice la implementación para grupos vulnerables y trabajadores esenciales; informe, promueva y haga cumplir las normas de seguridad vial; e informe (clara y accesiblemente) las órdenes de distanciamiento físico y los cambios producidos del urbanismo táctico (áreas, usos y horarios).

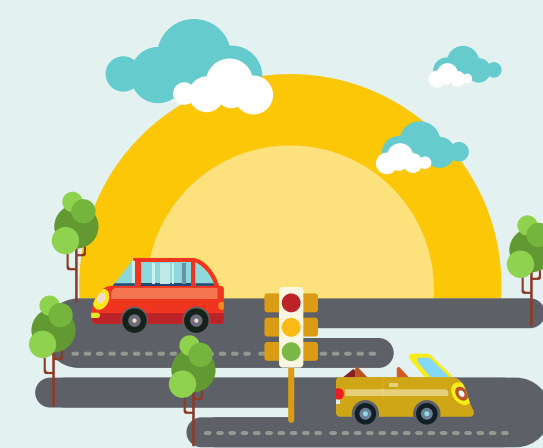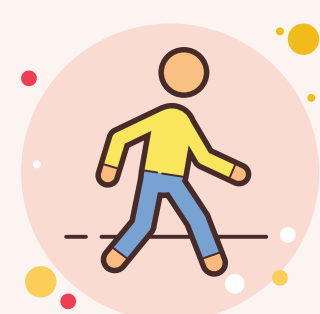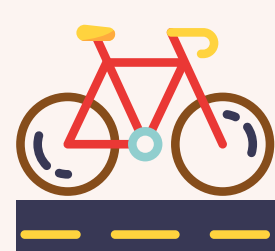

## 2. Aceras y carriles bici.

Promueva el caminar y andar en bicicleta; amplie el ancho, la longitud y la conectividad de las aceras y carriles bici para apoyar el distanciamiento físico y la seguridad vial; expanda las aceras y carriles bici alrededor de parques y espacios públicos para reducir la presión sobre estos espacios; implemente carriles bici protegidos; amplie el estacionamiento de bicicletas; implemente corredores y horarios para peatones y ciclistas que pertenezcan a poblaciones vulnerables (por ejemplo, ancianos e inmunocomprometidos); utilice las propuestas existentes de infraestructura peatonal y ciclista para guiar su expansión; y aliente el uso de cascos en los ciclistas.

### 3. Ciclovías recreativas.

Implemente ciclovías recreativas todos los días; expanda las ciclovías recreativas actuales; haga cumplir el distanciamiento físico; evite aglomeraciones; implemente horarios para poblaciones vulnerables; y use los protocolos de gestión del tráfico de las ciclovías recreativas para apoyar la expansión de nuevas aceras y carriles bici.

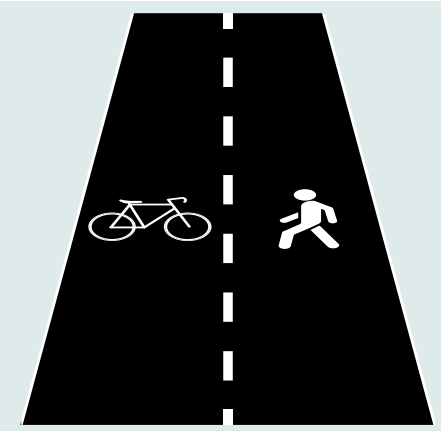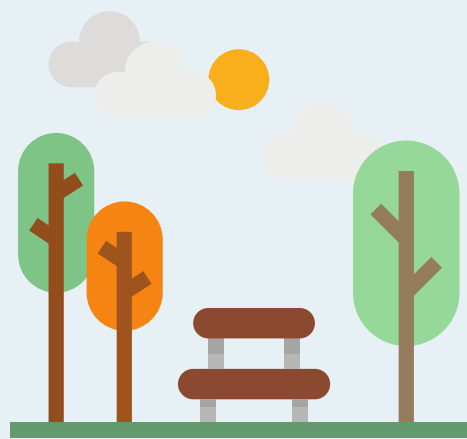

### 4. Parques y espacios públicos.

Mantenga abiertos grandes espacios públicos (por ejemplo, parques, y plazas) donde se pueda mantener el distanciamiento físico; expanda los espacios públicos que sean pequeños; haga cumplir el distanciamiento físico; amplie el estacionamiento de bicicletas/e-scooters; implemente horarios para poblaciones vulnerables; y evite aglomeraciones, informando y organizando visitas de usuarios a través de diferentes horarios.

### 5. Semáforos, señalización y límites de velocidad.

Cambie los semáforos que requieran oprimir algún botón a semáforos automáticos; ajuste el tiempo del semáforo favoreciendo a peatones y ciclistas; proporcione señalización actualizada del urbanismo táctico que sea clara y accesible; incluya las recomendaciones de quedarse en casa y distanciamiento físico en las pantallas y señales de tráfico; y reduzca los límites de velocidad en la ciudad.

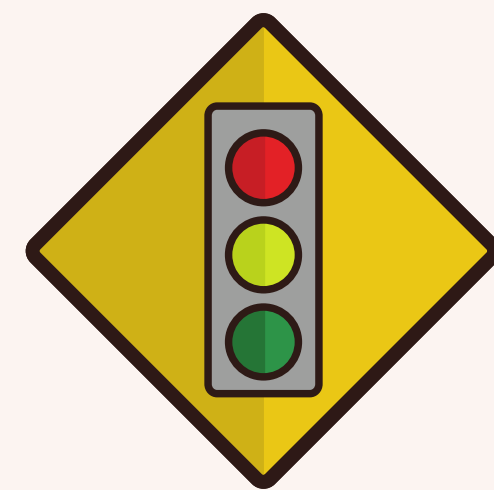

### 6. Transporte público, micromovilidad compartida (bicicletas, scooters) y vehículos compartidos (taxi, Uber / Lyft).

Implemente protocolos de limpieza estrictos y apoye la ventilación eficiente en vehículos y estaciones; implemente el embarque por la puerta trasera; suspenda el cobro de tarifas en persona o exente de tarifas; distribuya cubrebocas, gafas protectoras, guantes y desinfectante a conductores y pasajeros; limite la interacción pasajero-conductor; haga cumplir el distanciamiento físico; cierre cada dos filas de asientos; reduzca la ocupación máxima y aumente el servicio en rutas con mucha demanda; instale barreras físicas (p.ej., protectores contra estornudos); implemente horarios para poblaciones vulnerables y servicios de apoyo para trabajadores esenciales; promueva el uso compartido de bicicletas; amplie el estacionamiento de bicicletas/e-scooters; promueva el uso de cascos para bicicleta/scooter; integre la micromovilidad compartida al transporte público y carriles bici; y desaliente los viajes compartidos (carpool, vanpool).

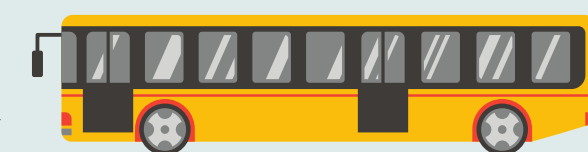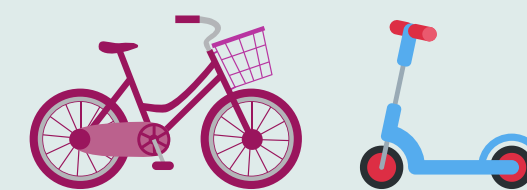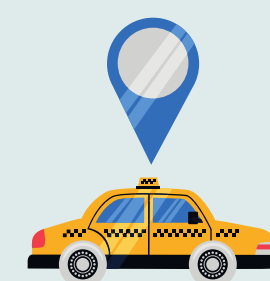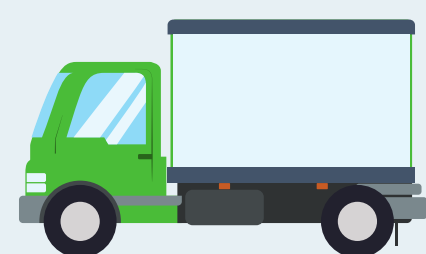

### 7. Tráfico motorizado.

Concentre el transporte motorizado en pocas calles y elimine los carriles de tráfico y espacios de estacionamiento para crear calles libres de coches; y cuando sea posible, concentre el tráfico de carga en las calles principales y durante la noche para mejorar la seguridad vial.

### 8. Comercios esenciales.

Designe las tiendas de bicicletas como servicios esenciales; amplie las aceras para intergar las filas de los negocios en las aceras, expandir los restaurantes y mercados al aire libre; evite aglomeraciones; haga cumplir la distancia física; y establezca zonas dedicadas de entrega / carga.

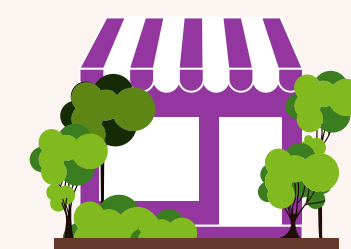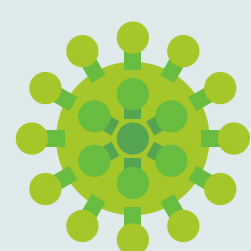

### 9. Lugares de prueba y vacunación para COVID-19.

Proporcione opciones de transporte para acceder a los sitios de prueba, vacunación y otros servicios de salud que sean accesibles a modos de transporte diferentes al automóvil.

### 10. Personas sin hogar.

Proporcione y adapte los servicios y el refugio para personas sin hogar que sean adecuados para el distanciamiento físico y manejo del COVID-19.

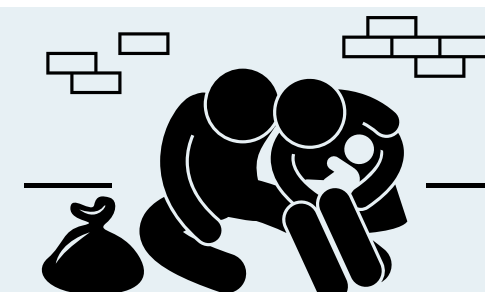

# Urbanismo tático

## em resposta à COVID-19

### intervenções de curto prazo com uma visão de saúde de longo prazo

O urbanismo tático é uma intervenção temporária e de baixo custo que pode ser implementada rapidamente em cidades de qualquer tamanho. Muitas dessas intervenções podem se tornar permanentes para promover melhorias urbanas e na saúde pública.

Este infográfico resume as intervenções de urbanismo tático que podem apoiar as estratégias de resposta à COVID-19, com uma visão de saúde de longo prazo. O urbanismo tático é uma ferramenta de contenção complementar à ação coordenada do governo, cujas estratégias devem incluir ampla cobertura de testagem de detecção do vírus, localização dos infectados e seus contatos, bem como estabelecer períodos de quarentena. Essas intervenções devem ser consideradas até que o tratamento curativo e/ou uma vacina estejam amplamente disponíveis.

#### INTERVENÇÕES DE URBANISMO TÁTICO

- Dar prioridade a grupos vulneráveis e trabalhadores essenciais
- Expandir calçadas e ciclovias
- Implementar ciclovias recreativas
- Adaptar parques e espaços públicos
- Adaptar semáforos e sinalização
- Reduzir os limites de velocidade
- Adaptar o transporte público
- Adaptar a micromobilidade compartilhada
- Adaptar os veículos compartilhados
- Adaptar os comércios essenciais
- Proporcionar acesso a pontos de testagem de COVID-19 a modos não motorizados
- Adaptar os serviços e refúgio para as pessoas em situação de rua

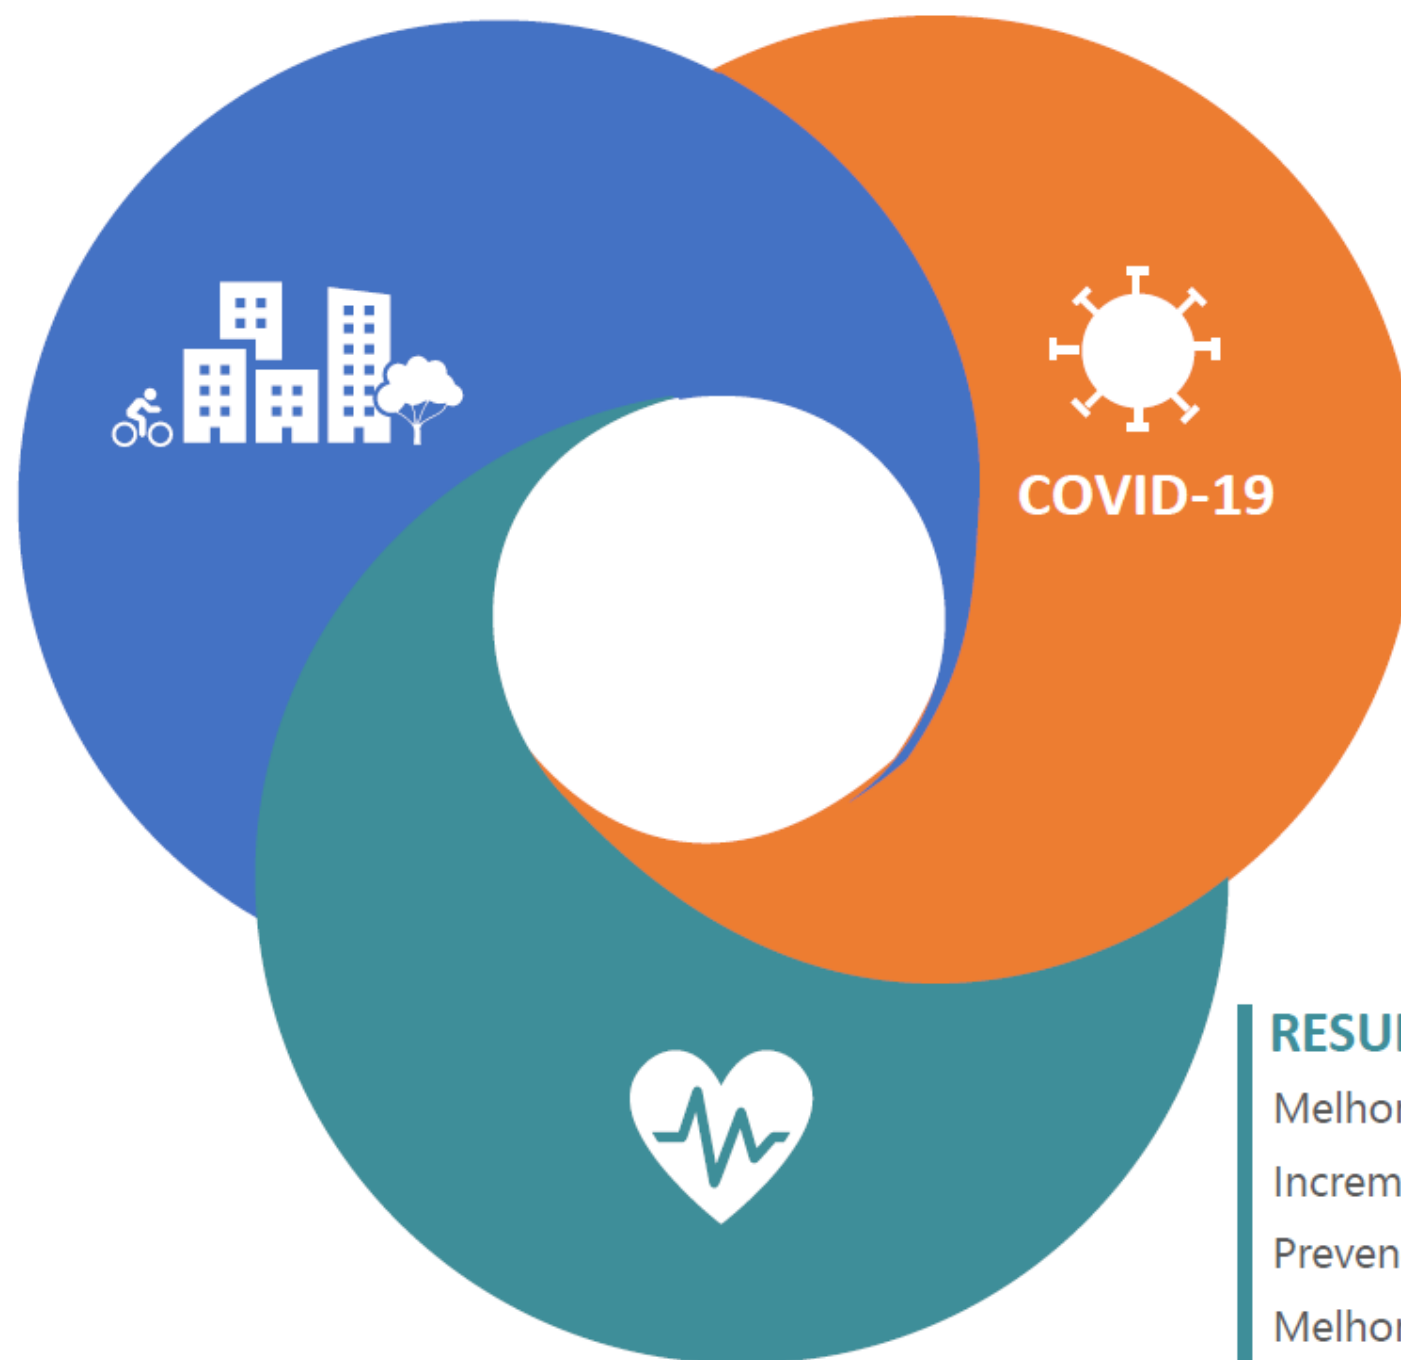

#### RESULTADOS A CURTO PRAZO

##### Mitigação da COVID-19

- Melhoria da qualidade do ar e da poluição sonora
- Incremento de atividade física
- Prevenção de lesões e mortes de trânsito
- Melhoria em saúde mental
- Prevenção de doenças não transmissíveis
- Menor demanda por serviços de saúde
- Promoção da igualdade

#### RESULTADOS A LONGO PRAZO

- Melhoria da qualidade do ar e da poluição sonora
- Incremento de atividade física
- Prevenção de lesões e mortes de trânsito
- Melhoria em saúde mental
- Prevenção de doenças não transmissíveis
- Menor demanda por serviços de saúde
- Promoção da igualdade

## 1. Recomendações gerais para o urbanismo tático.

Implementar intervenções de urbanismo tático cedo; desencorajar o uso de espaços públicos e transporte público para casos confirmados e suspeitos; promover o distanciamento físico de 2 metros; incentivar a atividade física; expandir os espaços públicos abertos; restringir o acesso a áreas públicas onde o distanciamento físico não é possível; evitar aglomerações; projetar as intervenções e priorizar a implementação atendendo grupos vulneráveis e trabalhadores essenciais; informar, promover e fazer cumprir as normas de segurança no trânsito; informar (de forma clara e acessível) as ordens de distanciamento físico e as mudanças urbanísticas táticas (áreas, usos e horários).

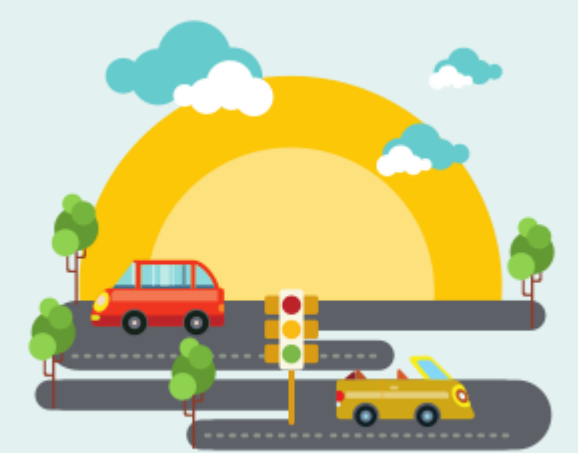

## 2. Calçadas e ciclovias.

Promover o deslocamento a pé e de bicicleta; expandir a largura, o comprimento e a conectividade das calçadas e ciclovias para apoiar o distanciamento físico e a segurança no trânsito; expandir calçadas e ciclovias no entorno de parques, trilhas e espaços públicos para reduzir a pressão sobre esses espaços; implementar ciclovias protegidas; expandir o estacionamento de bicicletas; implementar áreas e/ou horários para pedestres e ciclistas de populações vulneráveis (por exemplo idosos e imunocomprometidos); utilizar as propostas existentes de infraestrutura para pedestres e ciclistas para orientar o plano de expansão; incentivar o uso de capacetes de bicicleta

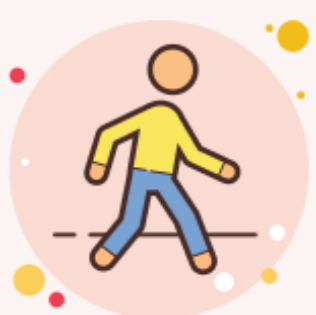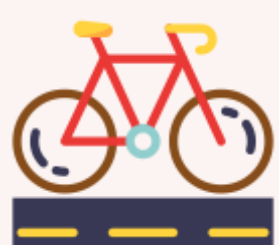

### 3. Ruas abertas.

Implementar ruas abertas diariamente; expandir as ruas abertas atuais; impor distância física; evitar aglomerações; implementar horários exclusivos para populações vulneráveis; utilizar protocolos de gestão das ruas abertas para apoiar a expansão de novas calçadas e infraestrutura cicloviária.

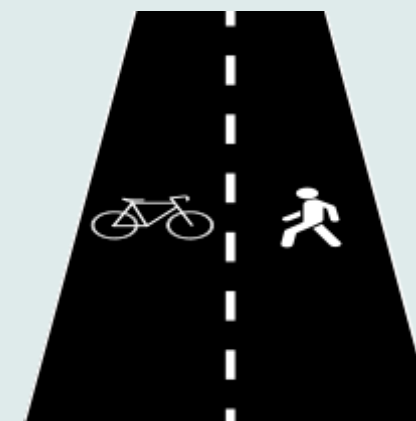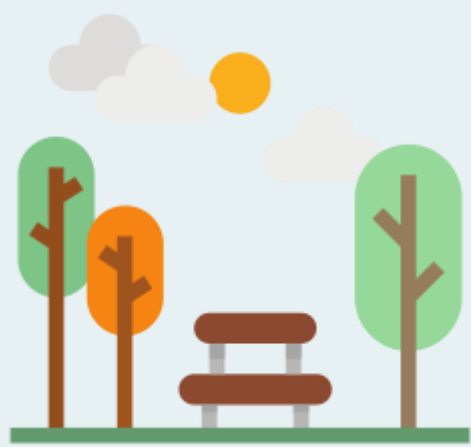

### 4. Parques e espaços públicos.

Manter grandes espaços públicos abertos, como parques e praças, onde a distância física pode ser respeitada; expandir espaços abertos que sejam pequenos; impor o distanciamento físico; evitar aglomerações; expandir estacionamento de bicicletas; implementar horários exclusivos para populações vulneráveis; e evitar o pico de uso, informando e organizando as visitas dos usuários em diferentes horários.

### 5. Semáforos, sinalização e limites de velocidade

Alterar a programação dos semáforos com botoeira para que os tempos sejam fixos, com prioridade para pedestres e ciclistas; implementar a sinalização de urbanismo tático de forma clara e acessível; incluir as recomendações de ficar em casa e distanciamento físico em telas e sinais de trânsito; reduzir os limites de velocidade máxima.

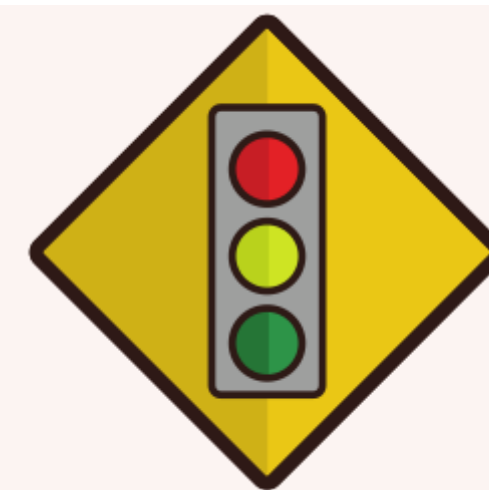

### 6. Transporte público, micromobilidade compartilhada (bicicleta e patinetes) e veículos compartilhados (táxi, Uber, 99).

Implementar protocolos rigorosos de limpeza e fomentar a ventilação em veículos e estações; implementar embarque de ônibus pela porta traseira para não expor o motorista; suspender a cobrança de tarifas por cobradores ou permitir o passe livre; distribuir máscaras, óculos de proteção, luvas e desinfetante para motoristas e passageiros; limitar a interação entre passageiro e motorista; impor distanciamento físico; a cada duas fileiras de assento, fechar uma; reduzir a ocupação máxima e aumentar o serviço em rotas de aglomeração; instalar barreiras físicas (por exemplo divisórias); estabelecer horários de uso exclusivo para populações vulneráveis (por exemplo idosos); implementar serviços de apoio a trabalhadores essenciais; promover compartilhamento de bicicleta; expandir o estacionamento de bicicletas junto às estações e terminais de transporte coletivo; integrar micromobilidade compartilhada ao transporte público e ciclovias; desencorajar ou interromper viagens compartilhadas em veículos privados (por exemplo carpooling ou van).

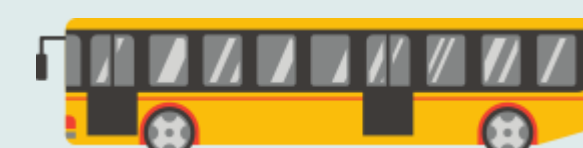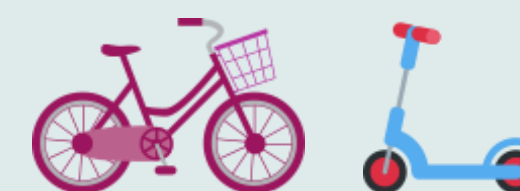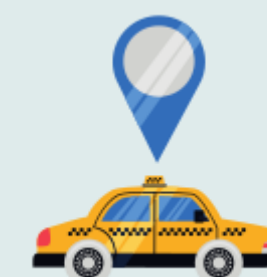

### 7. Tráfego motorizado.

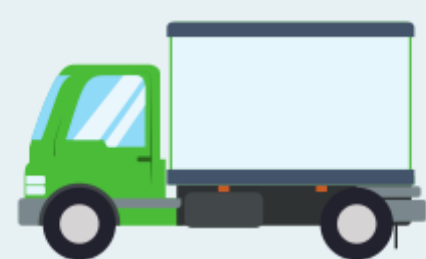

Concentrar o transporte motorizado em poucas ruas e remover faixas de tráfego e de estacionamento para priorizar o transporte ativo e a segurança no trânsito; implantar ruas sem carro; concentrar o tráfego de mercadorias nas vias principais e à noite para melhorar a segurança no trânsito.

### 8. Comércio essencial.

Designar as lojas de bicicleta como serviço essencial; expandir calçadas para acomodar as filas de pessoas, as mesas de restaurantes e os mercados ao ar livre; evitar aglomerações; impor distância física; oferecer serviços de entrega por meios não motorizados; estabelecer vagas dedicadas a carga e descarga.

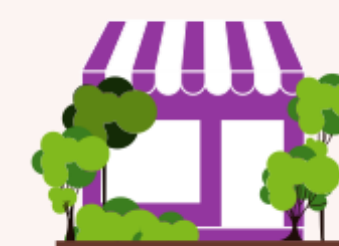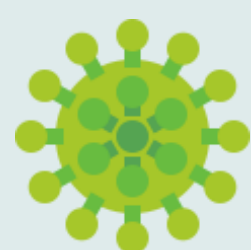

### 9. Pontos de teste e vacinação de COVID-19.

Oferecer opções de transporte ativo e coletivo para acessar os postos de teste, vacinação e outros serviços de saúde.

### 10. Pessoas em situação de rua.

Fornecer e adaptar abrigos e serviços para pessoas em situação de rua que sejam adequados ao distanciamento físico para evitar a propagação de COVID-19.

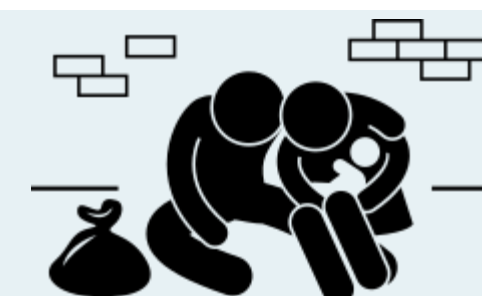

Supplement: 40572_2021_307_MOESM1_ESM.pdf [file 40572_2021_307_MOESM1_ESM.pdf]
